# Supplementary material for: Nitrogen-doped cyan-emissive carbon quantum dots for fluorescence tetracycline detection and lysosome imaging
Source: Royal Society of Chemistry journal article supplement (doi:10.1039/d2ra04945g), 2022-01-01
Supplement: d2ra04945g1.pdf [file d2ra04945g1.pdf]

## Supplementary Material

**Tongtong Zhu<sup>ab</sup>, Lei Cao<sup>ab</sup>, Xinyue Kou<sup>ab</sup>, Yulu Liu<sup>ab</sup>, Wen-Fei Dong<sup>ab</sup>,  
Mingfeng Ge<sup>b\*</sup>, and Li Li<sup>b\*</sup>**

- a. School of Biomedical Engineering (Suzhou), Division of Life Sciences and Medicine, University of Science and Technology of China, Hefei 230026, P. R. China;
- b. CAS Key Laboratory of Biomedical Diagnostics, Suzhou Institute of Biomedical Engineering and Technology, Chinese Academy of Science (CAS), Suzhou 215163, P. R. China;

\* Corresponding authors.

E-mail addresses: gemf@sibet.ac.cn, lil@sibet.ac.cn.

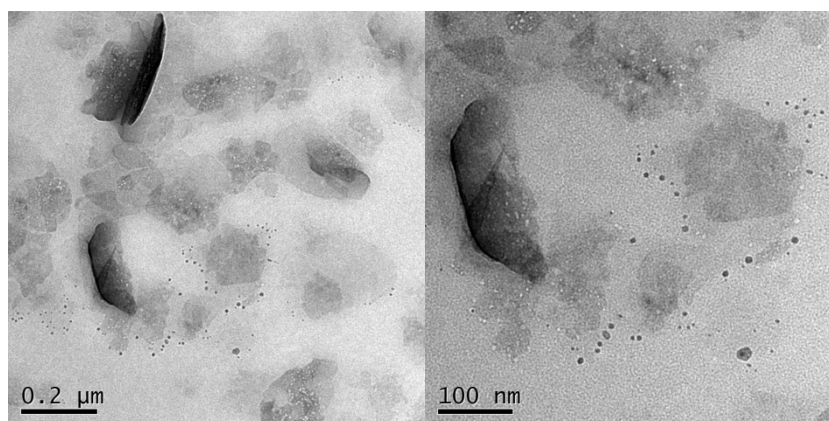

**Figure S1.** Other size TEM images (0.2  $\mu\text{m}$ , 100 nm) of C-CQDs. It is obvious that the size of C-CQDs is mainly distributed below 10 nm, and combining the results of DLS can indicate that the size of C-CQDs is between 7 and 9 nm.

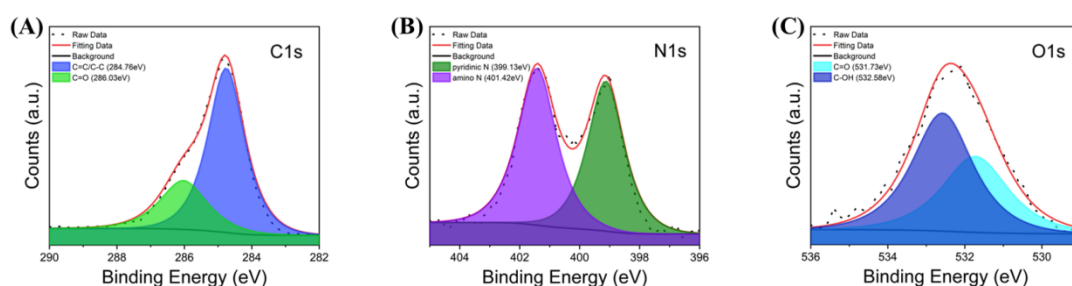

**Figure S2.** C 1s(A), N 1s(B), O 1s(C) XPS spectrum of C-CDs. The high-resolution C 1s spectrum (A) can be deconvoluted into two peaks at 284.76 and 286.03 eV, which corresponded to C=C/C-C and C=O bonds, respectively. The high-resolution N 1s spectrum (B) shows two peaks at 399.13 and 401.42 eV, which indicated the presence of pyridinic N and amino N, respectively. The two main bands at 531.73 and 532.58 eV in the high-resolution O 1s spectrum (C) could be identified as C=O and C-OH, respectively.

**Table S1.** Analytical results for the detection of TCs in real samples (n = 5). Milk has been processed. C-CQDs were prepared one day earlier and used after 24h of placement. To reduce the error, detection was performed immediately after the addition of antibiotics.

| Tetracycline | Added<br>( $\mu\text{g/mL}$ ) | Found<br>( $\mu\text{g/mL}$ ) | Recovery (%) | RSD (%) |
|--------------|-------------------------------|-------------------------------|--------------|---------|
| CTC          | 2.00                          | 1.97                          | 98.5         | 0.88    |
|              | 5.00                          | 4.99                          | 99.8         | 0.94    |
|              | 10.00                         | 10.21                         | 102.1        | 0.83    |
| OTC          | 2.00                          | 2.04                          | 100.5        | 1.02    |
|              | 5.00                          | 5.04                          | 100.8        | 0.94    |
|              | 10.00                         | 9.98                          | 99.8         | 0.88    |
| TET          | 2.00                          | 1.94                          | 97.0         | 0.82    |
|              | 5.00                          | 4.91                          | 98.2         | 0.87    |
|              | 10.00                         | 9.97                          | 99.7         | 0.97    |

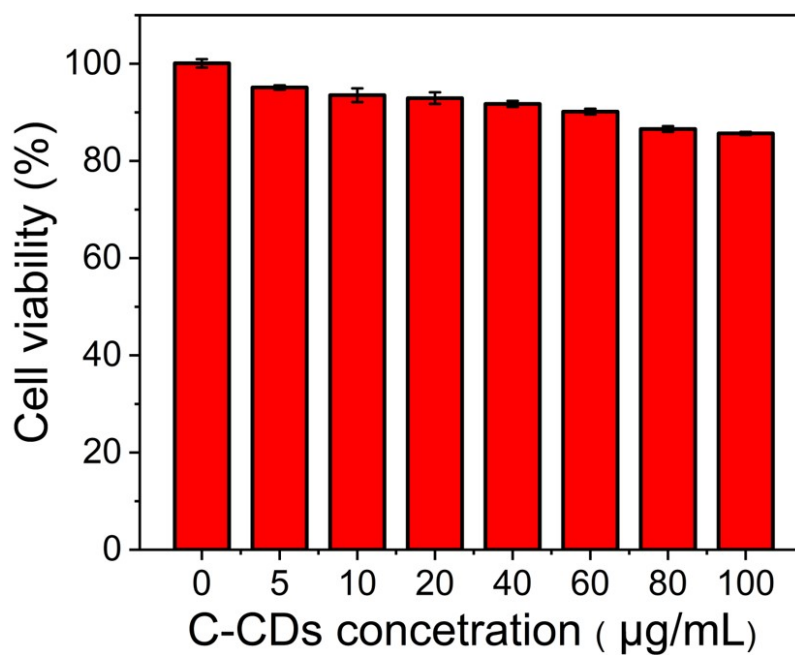

**Figure S3.** The cell viabilities of HeLa cells under different concentrations of the C-CDs.

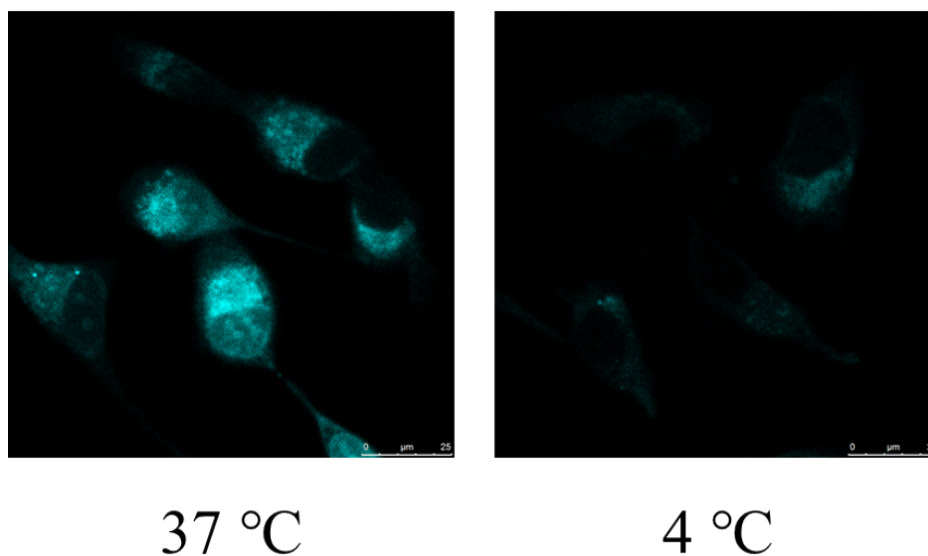

**Figure S4.** Laser scanning confocal microscope images of HeLa cells under 37°C and 4°C. It can be seen that the fluorescence intensity of C-CQDs in the cells decreased significantly, which indicated that the uptake of C-CQDs depends on cellular energy.
